# Supplementary material for: The regulatory role of the RANKL/RANK/OPG signaling pathway in the mechanisms of tooth eruption in patients with impacted teeth
Source: Springer Nature journal article supplement (doi:10.1186/s12903-020-01251-y), 2020-09-18

**Supplementary Information file**  
**Initial set of Western blot experiments**  
**(full-length, original, unprocessed versions of blots)**

**Table 1 Sample labelling**

| Patients                             | Group                                                                                                          | Patient № | Sample labelling | Weight of bone tissue sample, g |
|--------------------------------------|----------------------------------------------------------------------------------------------------------------|-----------|------------------|---------------------------------|
| Patients with normally erupted teeth | #1 – bone tissue, that was taken from the area of the normally erupted third molar (control group)             | 1         | <b>1-1</b>       | 0.0457                          |
|                                      |                                                                                                                | 3         | <b>1-2</b>       | 0.0522                          |
|                                      |                                                                                                                | 4         | <b>1-3</b>       | 0.0674                          |
|                                      |                                                                                                                | 5         | <b>1-4</b>       | 0.0575                          |
|                                      |                                                                                                                | 6         | <b>1-5</b>       | 0.0661                          |
|                                      |                                                                                                                | 8         | <b>1-6</b>       | 0.0355                          |
| Patients with tooth impaction        | #2 – bone tissue of patients with tooth impaction, collected from the area of the normally erupted third molar | 9         | <b>2-1</b>       | 0.0341                          |
|                                      |                                                                                                                | 10        | <b>2-2</b>       | 0.0481                          |
|                                      |                                                                                                                | 11        | <b>2-3</b>       | 0.0452                          |
|                                      |                                                                                                                | 12        | <b>2-4</b>       | 0.0503                          |
|                                      |                                                                                                                | 13        | <b>2-5</b>       | 0.0388                          |
|                                      |                                                                                                                | 14        | <b>2-6</b>       | 0.0426                          |
|                                      | #3 – bone tissue of patients with tooth impaction, collected from the area of the impacted third molar         | 15        | <b>3-1</b>       | 0.0513                          |
|                                      |                                                                                                                | 16        | <b>3-2</b>       | 0.0641                          |
|                                      |                                                                                                                | 17        | <b>3-3</b>       | 0.0852                          |
|                                      |                                                                                                                | 18        | <b>3-4</b>       | 0.0374                          |
|                                      |                                                                                                                | 19        | <b>3-5</b>       | 0.0371                          |
|                                      |                                                                                                                | 20        | <b>3-6</b>       | 0.0509                          |

Fig. 1 Raw data from Western blot experiments using RANK antibody

Immunoblotting was conducted with primary antibody against RANK (1:500; sc-9072, Santa Cruz, USA). Samples are labelled (according to the Table 1) under the images.

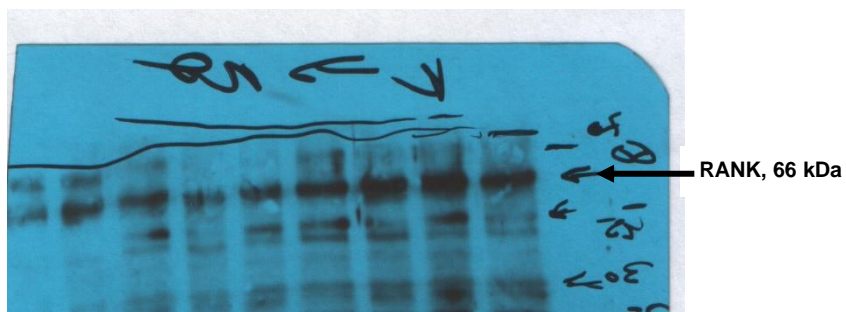

1-1 1-2 1-3 2-1 2-2 2-3 3-1 3-2 3-3

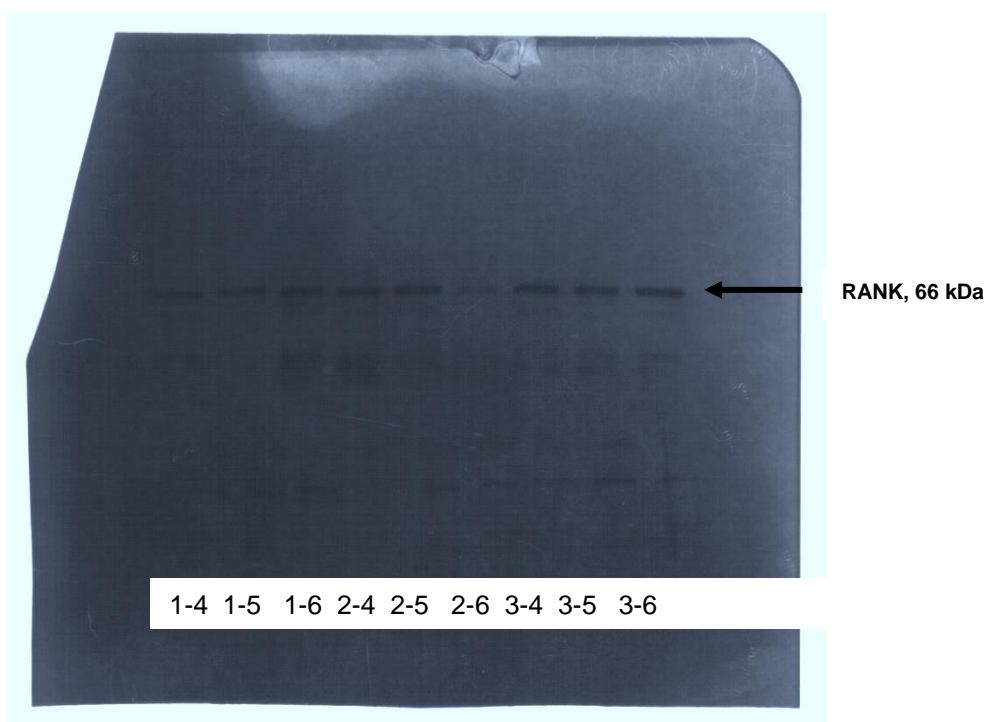

1-4 1-5 1-6 2-4 2-5 2-6 3-4 3-5 3-6

Fig. 2 Raw data from Western blot experiments using osteoprotegerin (OPG) antibody

Immunoblotting was conducted with primary antibody against OPG (1:250; sc-8468, Santa Cruz, USA). Samples are labelled (according to the Table 1) under the image.

10 sec exposition

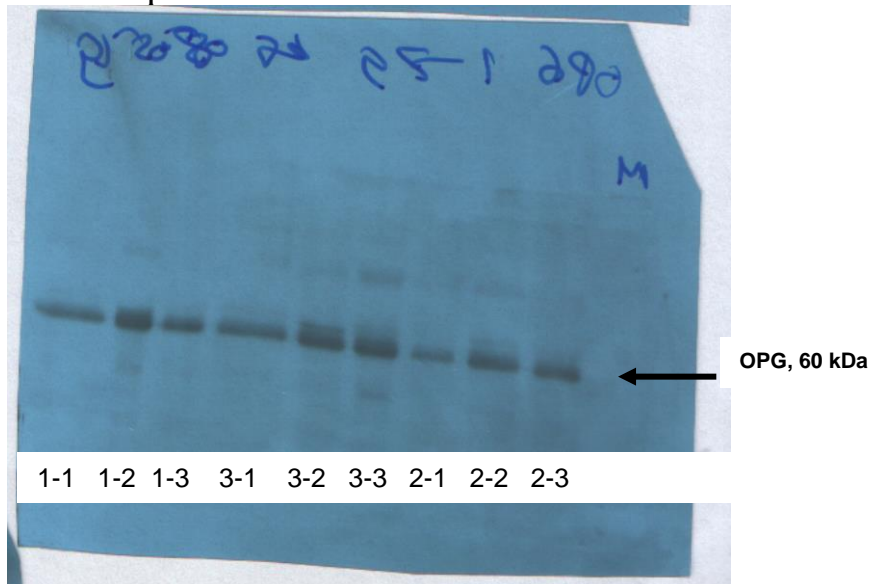

30 sec exposition

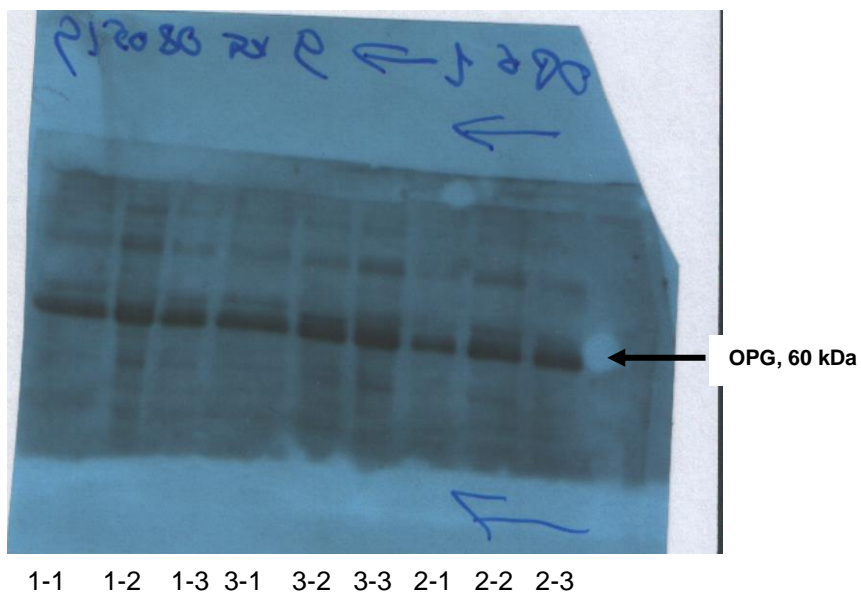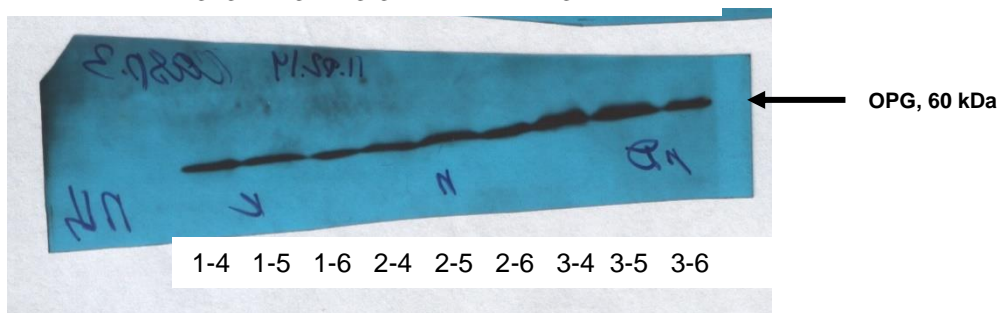

Fig. 3 Raw data from Western blot experiments using osteocalcin (OC) antibody

Immunoblotting was conducted with primary antibody against OC (1:500; sc-18319, Santa Cruz, USA). Samples are labelled (according to the Table 1) under the image.

10 sec exposition

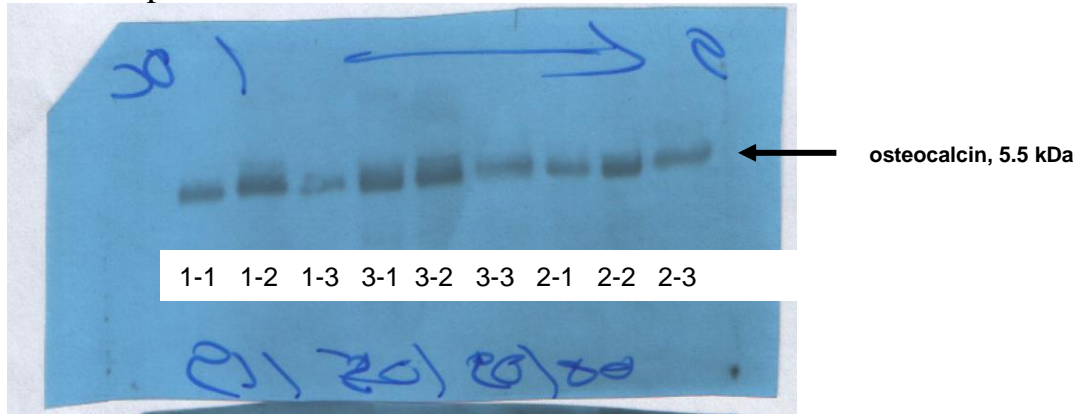

25 sec exposition

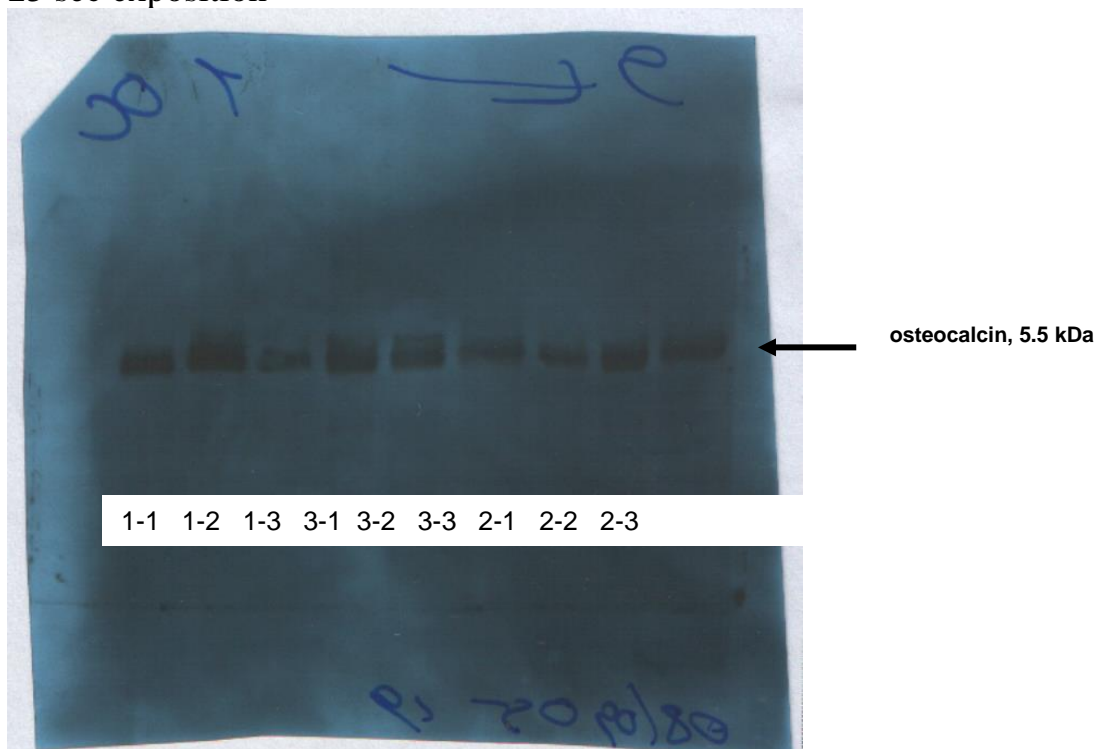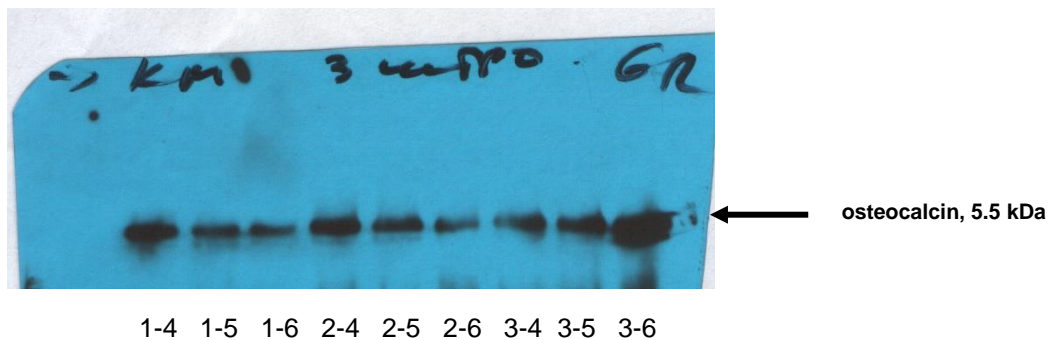

Fig. 4 Raw data from Western blot experiments using RANKL antibody

Immunoblotting was conducted with primary antibody against RANKL (1:250; sc-7628, Santa Cruz, USA). Samples are labelled (according to the Table 1) under the image.

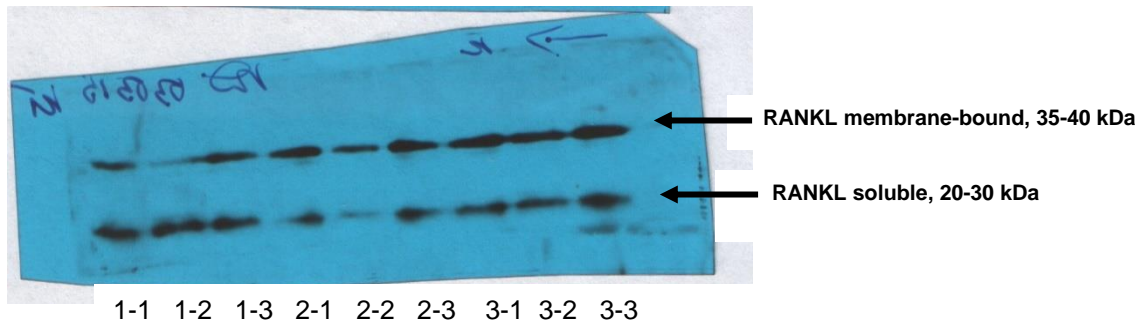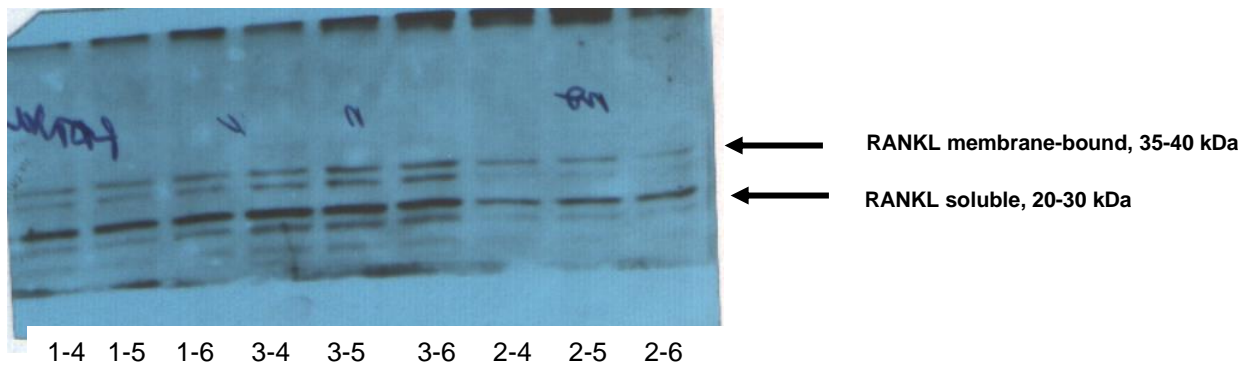

Fig. 5 Raw data from Western blot experiments using NF- $\kappa$ B antibody

Immunoblotting was conducted with primary antibody against NF- $\kappa$ B p65 subunit (1:500; MA5-16160, Thermo Fisher Scientific, USA). Samples are labelled (according to the Table 1) under the image.

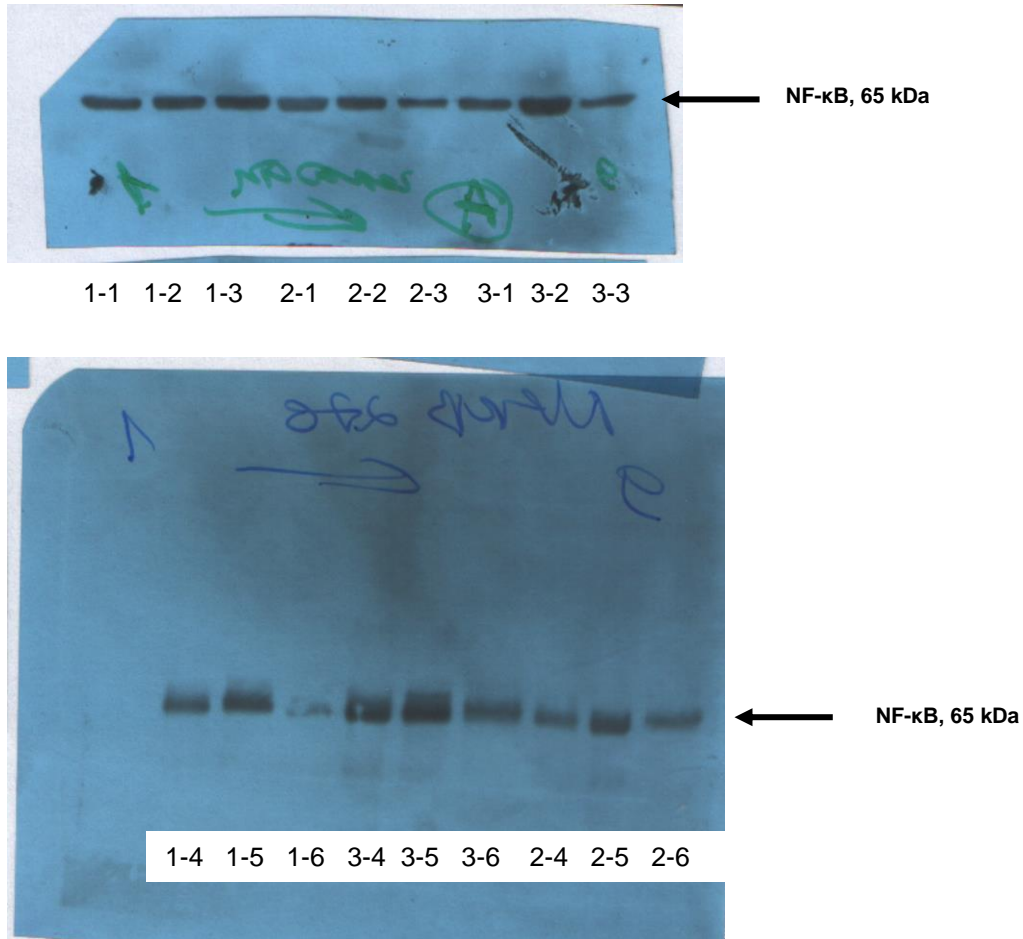

Fig. 6 Raw data from Western blot experiments using NFATc1 antibody

Immunoblotting was conducted with primary antibody against NFATc1 (1:1000; MA3-024, Thermo Fisher Scientific, USA). Samples are labelled (according to the Table 1) under the image.

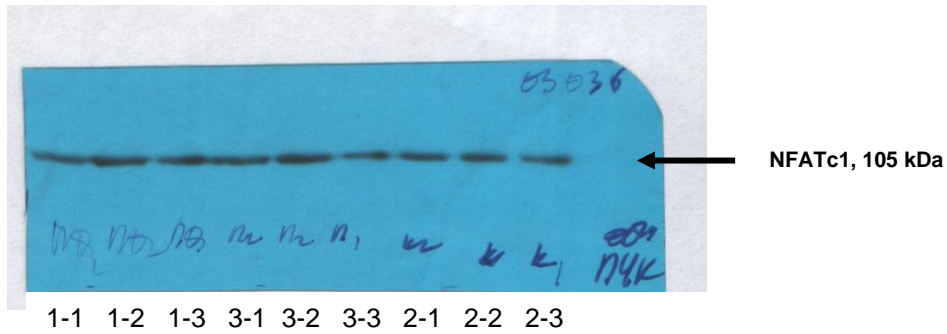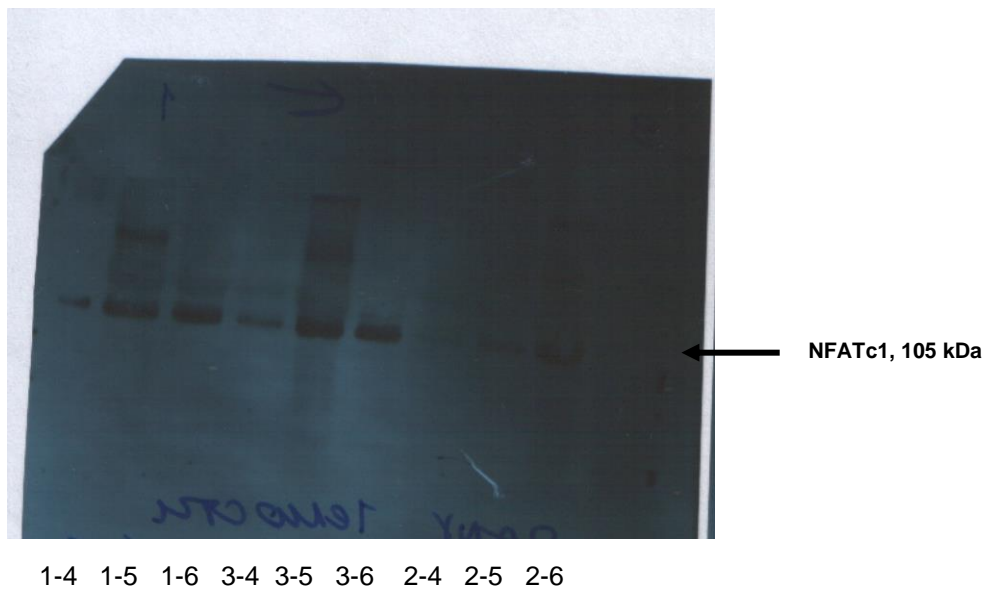

Fig. 7 Raw data from Western blot experiments using caspase-3 antibody

Immunoblotting was conducted with primary antibody against caspase-3 (1:500; sc-373730, Santa Cruz, USA). Samples are labelled (according to the Table 1) under the image.

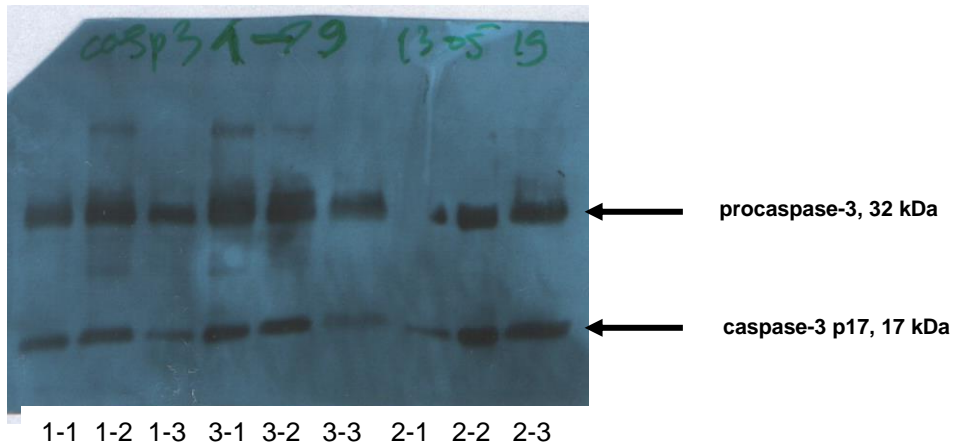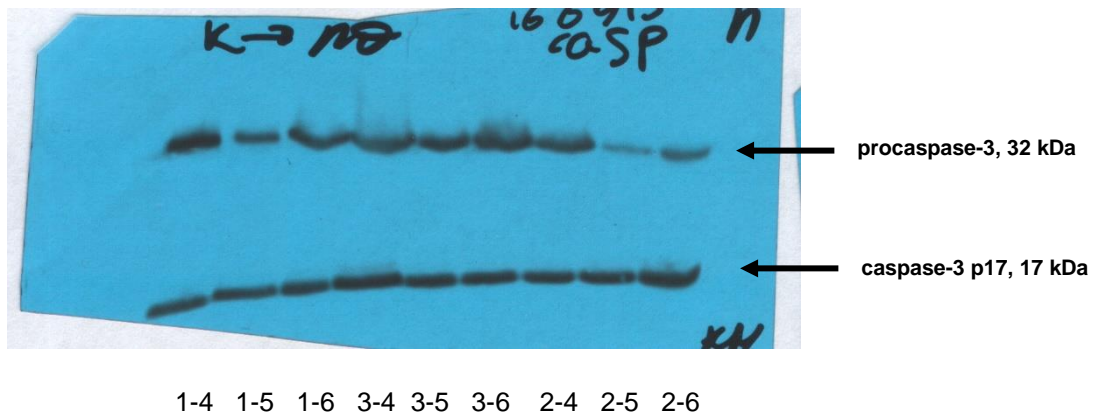

Supplement: MOESM1 [file 18394314]
